# Supplementary material for: Association Between Insight and Outcome of Psychotherapy: Systematic Review and Meta-Analysis
Source: Atypon-hosted journal article supplement (doi:10.1176/appi.ajp.2018.17080847), 2018-08-02
Supplement: appi.ajp.2018.17080847.ds001.pdf [file appi.ajp.2018.17080847.ds001.pdf]

**Risk of Bias Assessment**

Study (Author, Year): \_\_\_\_\_

**1. Sample**

|                                                                            |                             |                                  |                                         |
|----------------------------------------------------------------------------|-----------------------------|----------------------------------|-----------------------------------------|
| 1. The sample is representative of the population from which it was drawn. |                             |                                  |                                         |
| <input type="checkbox"/> yes                                               | <input type="checkbox"/> no | <input type="checkbox"/> unclear | <input type="checkbox"/> not applicable |

|                                                |                             |                                  |                                         |
|------------------------------------------------|-----------------------------|----------------------------------|-----------------------------------------|
| 2. The source of the sample is clearly stated. |                             |                                  |                                         |
| <input type="checkbox"/> yes                   | <input type="checkbox"/> no | <input type="checkbox"/> unclear | <input type="checkbox"/> not applicable |

|                                                                                               |                             |                                  |                                         |
|-----------------------------------------------------------------------------------------------|-----------------------------|----------------------------------|-----------------------------------------|
| 3. The sample size is appropriate to determine statistical significance for primary outcomes. |                             |                                  |                                         |
| <input type="checkbox"/> yes                                                                  | <input type="checkbox"/> no | <input type="checkbox"/> unclear | <input type="checkbox"/> not applicable |

**2. Quality of measurements**

|                                                         |                             |                                  |                                         |
|---------------------------------------------------------|-----------------------------|----------------------------------|-----------------------------------------|
| 4. Insight measure(s) is/are operationalized precisely. |                             |                                  |                                         |
| <input type="checkbox"/> yes                            | <input type="checkbox"/> no | <input type="checkbox"/> unclear | <input type="checkbox"/> not applicable |

|                                                                                                           |                             |                                  |                                         |
|-----------------------------------------------------------------------------------------------------------|-----------------------------|----------------------------------|-----------------------------------------|
| 5. Psychometric properties of insight measure(s) is/are adequate (reliability $\geq$ .80 + face validity) |                             |                                  |                                         |
| <input type="checkbox"/> yes                                                                              | <input type="checkbox"/> no | <input type="checkbox"/> unclear | <input type="checkbox"/> not applicable |

|                                                         |                             |                                  |                                         |
|---------------------------------------------------------|-----------------------------|----------------------------------|-----------------------------------------|
| 6. Outcome measure(s) is/are operationalized precisely. |                             |                                  |                                         |
| <input type="checkbox"/> yes                            | <input type="checkbox"/> no | <input type="checkbox"/> unclear | <input type="checkbox"/> not applicable |

|                                                                                                           |                             |                                  |                                         |
|-----------------------------------------------------------------------------------------------------------|-----------------------------|----------------------------------|-----------------------------------------|
| 7. Psychometric properties of outcome measure(s) is/are adequate (reliability $\geq$ .80 + face validity) |                             |                                  |                                         |
| <input type="checkbox"/> yes                                                                              | <input type="checkbox"/> no | <input type="checkbox"/> unclear | <input type="checkbox"/> not applicable |

**3. Further Distorting Influences**

|                                    |                             |                                  |                                         |
|------------------------------------|-----------------------------|----------------------------------|-----------------------------------------|
| 8. Attrition rate is less than 5%. |                             |                                  |                                         |
| <input type="checkbox"/> yes       | <input type="checkbox"/> no | <input type="checkbox"/> unclear | <input type="checkbox"/> not applicable |

|                                                                                                    |                             |                                  |                                         |
|----------------------------------------------------------------------------------------------------|-----------------------------|----------------------------------|-----------------------------------------|
| 9. Insight and outcome are rated by different sources (patient, therapist, external observer ...)? |                             |                                  |                                         |
| <input type="checkbox"/> yes                                                                       | <input type="checkbox"/> no | <input type="checkbox"/> unclear | <input type="checkbox"/> not applicable |

|                                                             |                             |                                  |                                         |
|-------------------------------------------------------------|-----------------------------|----------------------------------|-----------------------------------------|
| 10. Time of measurement(s) of insight is clearly indicated. |                             |                                  |                                         |
| <input type="checkbox"/> yes                                | <input type="checkbox"/> no | <input type="checkbox"/> unclear | <input type="checkbox"/> not applicable |

|                                                             |                             |                                  |                                         |
|-------------------------------------------------------------|-----------------------------|----------------------------------|-----------------------------------------|
| 11. Time of measurement(s) of outcome is clearly indicated. |                             |                                  |                                         |
| <input type="checkbox"/> yes                                | <input type="checkbox"/> no | <input type="checkbox"/> unclear | <input type="checkbox"/> not applicable |

|                                                          |                             |                                  |                                         |
|----------------------------------------------------------|-----------------------------|----------------------------------|-----------------------------------------|
| 12. Insight and outcome are rated in different sessions. |                             |                                  |                                         |
| <input type="checkbox"/> yes                             | <input type="checkbox"/> no | <input type="checkbox"/> unclear | <input type="checkbox"/> not applicable |

|                                                                         |                             |                                  |                                         |
|-------------------------------------------------------------------------|-----------------------------|----------------------------------|-----------------------------------------|
| 13. Zero-order correlation of insight and outcome is directly reported. |                             |                                  |                                         |
| <input type="checkbox"/> yes                                            | <input type="checkbox"/> no | <input type="checkbox"/> unclear | <input type="checkbox"/> not applicable |

#### 4. Reporting of data

|                                            |                             |                                  |                                         |
|--------------------------------------------|-----------------------------|----------------------------------|-----------------------------------------|
| 14. Explanation for missing data is given. |                             |                                  |                                         |
| <input type="checkbox"/> yes               | <input type="checkbox"/> no | <input type="checkbox"/> unclear | <input type="checkbox"/> not applicable |

|                                                                                  |                             |                                  |                                         |
|----------------------------------------------------------------------------------|-----------------------------|----------------------------------|-----------------------------------------|
| 15. Data are clearly and accurately presented (including CIs where appropriate). |                             |                                  |                                         |
| <input type="checkbox"/> yes                                                     | <input type="checkbox"/> no | <input type="checkbox"/> unclear | <input type="checkbox"/> not applicable |

|                                                          |                             |                                  |                                         |
|----------------------------------------------------------|-----------------------------|----------------------------------|-----------------------------------------|
| 16. There is <b>no</b> evidence for selective reporting. |                             |                                  |                                         |
| <input type="checkbox"/> yes                             | <input type="checkbox"/> no | <input type="checkbox"/> unclear | <input type="checkbox"/> not applicable |

#### Conclusion

|                                    |  |
|------------------------------------|--|
| Sum of "no" and "unclear"-answers: |  |
| Sum of applicable items:           |  |
| Ratio (i.e. Risk of Bias score):   |  |
